# Supplementary material for: Evaluating corrosion inhibition property of some Schiff bases for mild steel in 1 M HCl: competitive effect of the heteroatom and stereochemical conformation of the molecule
Source: Royal Society of Chemistry journal article supplement (doi:10.1039/c6ra03521c), 2016-01-01
Supplement: c6ra03521c1.pdf [file c6ra03521c1.pdf]

**SUPPLEMENTARY INFORMATION**

**Evaluating corrosion inhibition property of some Schiff bases for mild steel in 1M HCl:  
competitive effect of heteroatom and stereochemical conformation of the molecule**

**Alok Dutta,<sup>a</sup> Sourav Kr. Saha,<sup>b,c</sup> Priyabrata Banerjee,<sup>b,c</sup> Apurba K. Patra<sup>a</sup> and Dipankar  
Sukul<sup>a\*</sup>**

*<sup>a</sup>Department of Chemistry, National Institute of Technology, Durgapur 713 209, India. E-mail  
address: dipankar.sukul@gmail.com (D. Sukul). Tel.: +919932244348; fax: +913432547375.*

*<sup>b</sup>Surface Engineering & Tribology Group, CSIR-Central Mechanical Engineering Research  
Institute, Durgapur 713209, India.*

*<sup>c</sup> Academy of Scientific and Innovative Research, CSIR-CMERI Campus, Durgapur 713209,  
India*

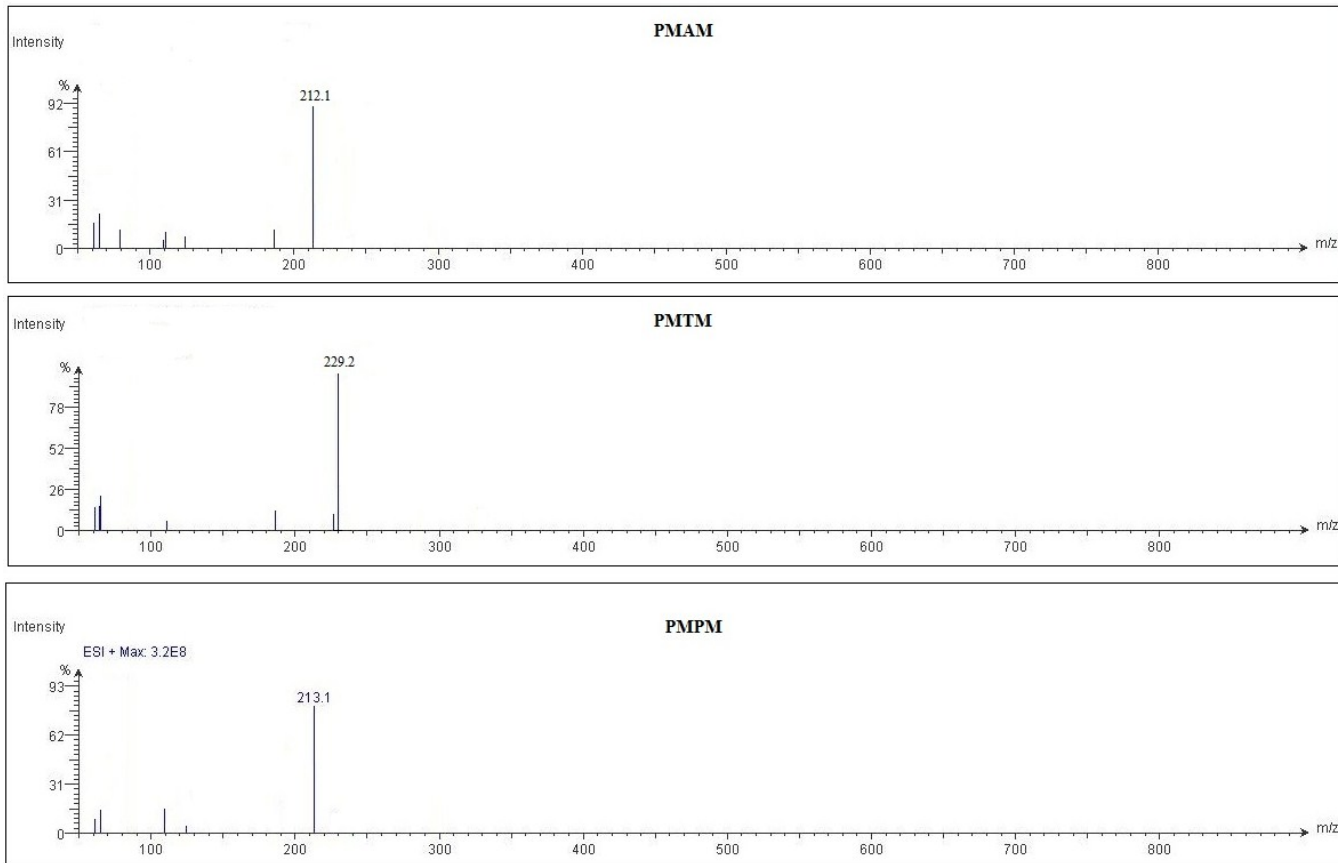

**Fig. S1** ESI-MS spectrum of of PMAM, PMTM and PMPM inhibitors in methanol.

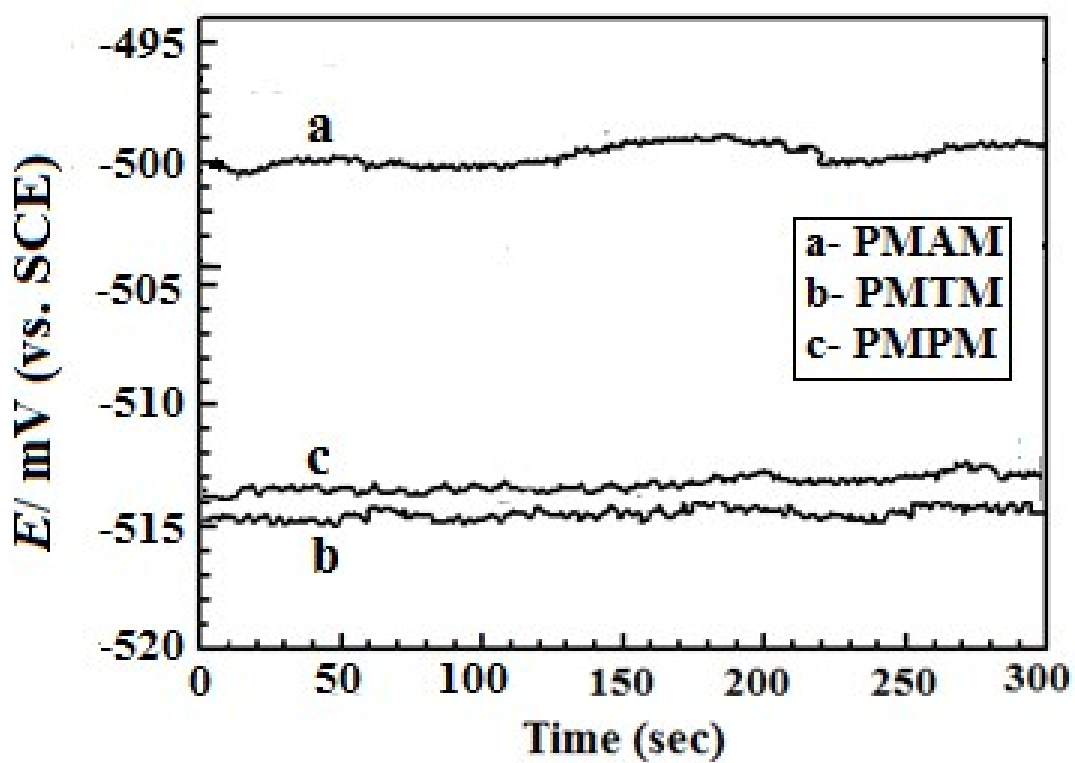

**Fig. S2.** Variation of rest potential with time for mild steel in 1M HCl having 10 mM Schiff-base after an exposure for 45 mins.

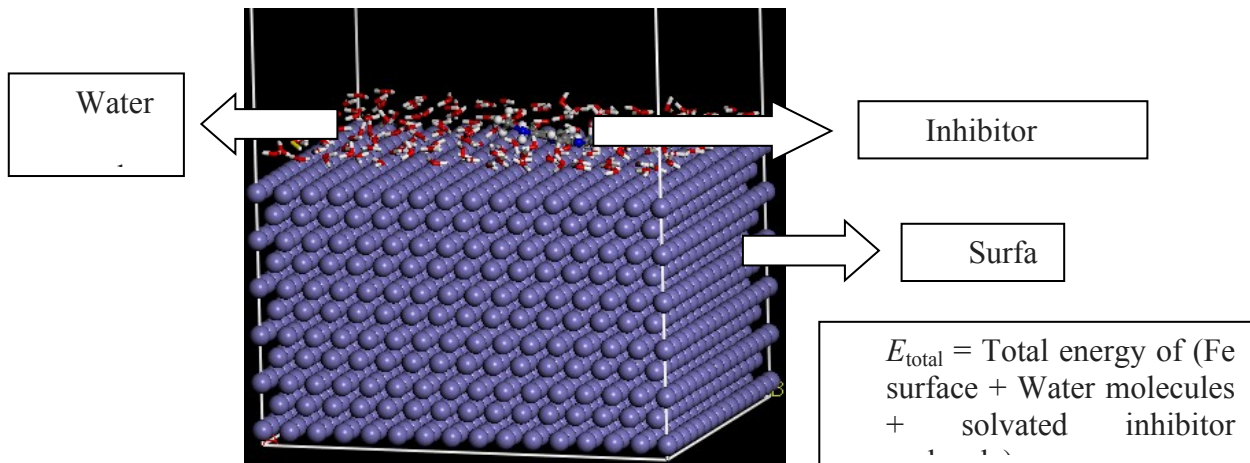

A) Box 1: At equilibrated state, inhibitor molecule is in solvated form.

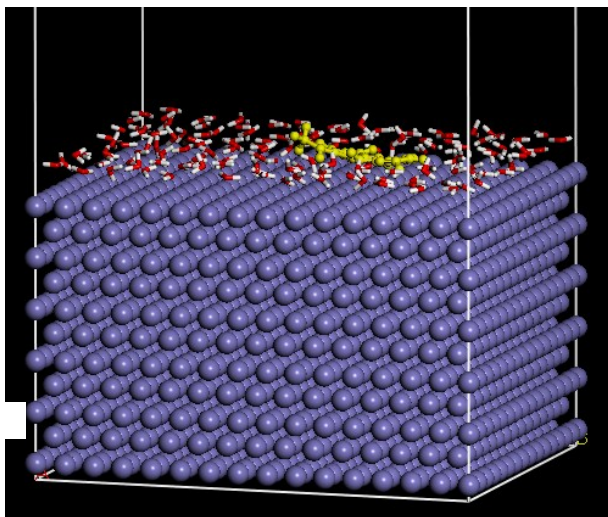

B) Fe surface and solvent water molecules are selected from box 1 (solvated inhibitor is not selected and is reflected in yellow impression) to obtain  $E_{\text{surface+water}}$ .

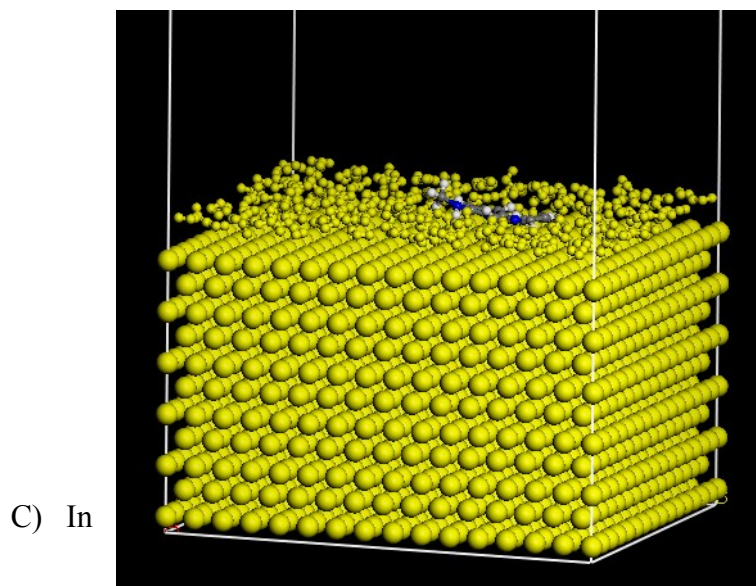

solvent stabilized inhibitor molecule present in box 1 will result into  $E_{\text{inh(solv)}}$ .

**Fig. S3 (A-C).** Pictorial representation for deriving the energy components following MD simulation experimentation.

**Fig. S4 A**

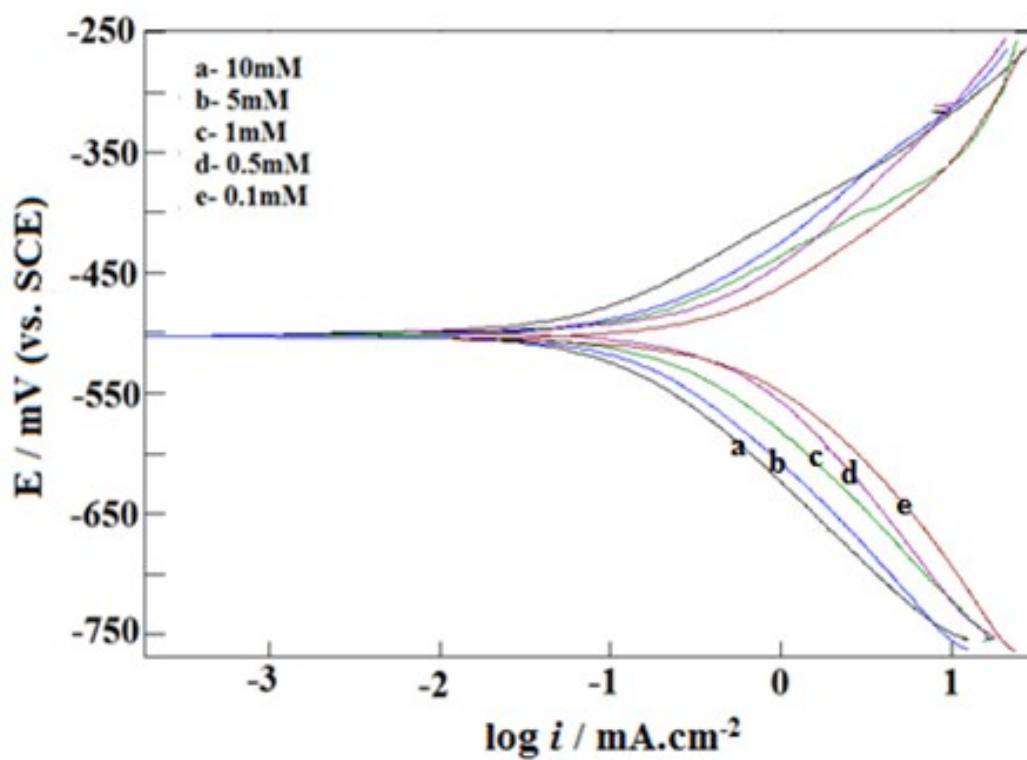

Fig. S4 B

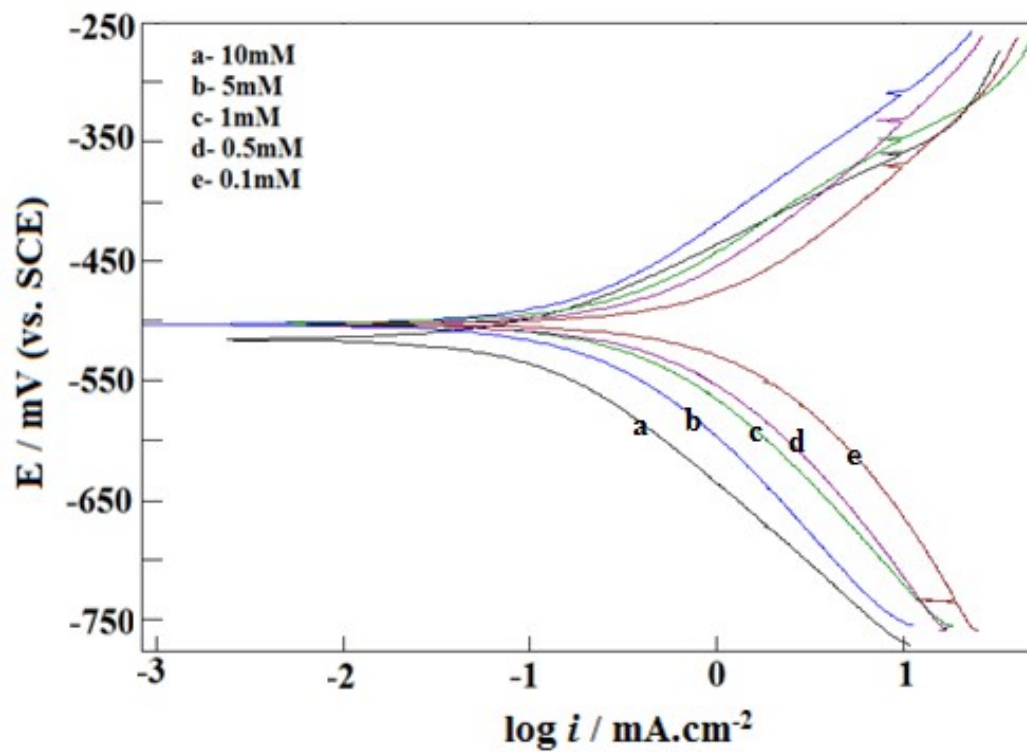

Fig.  
C

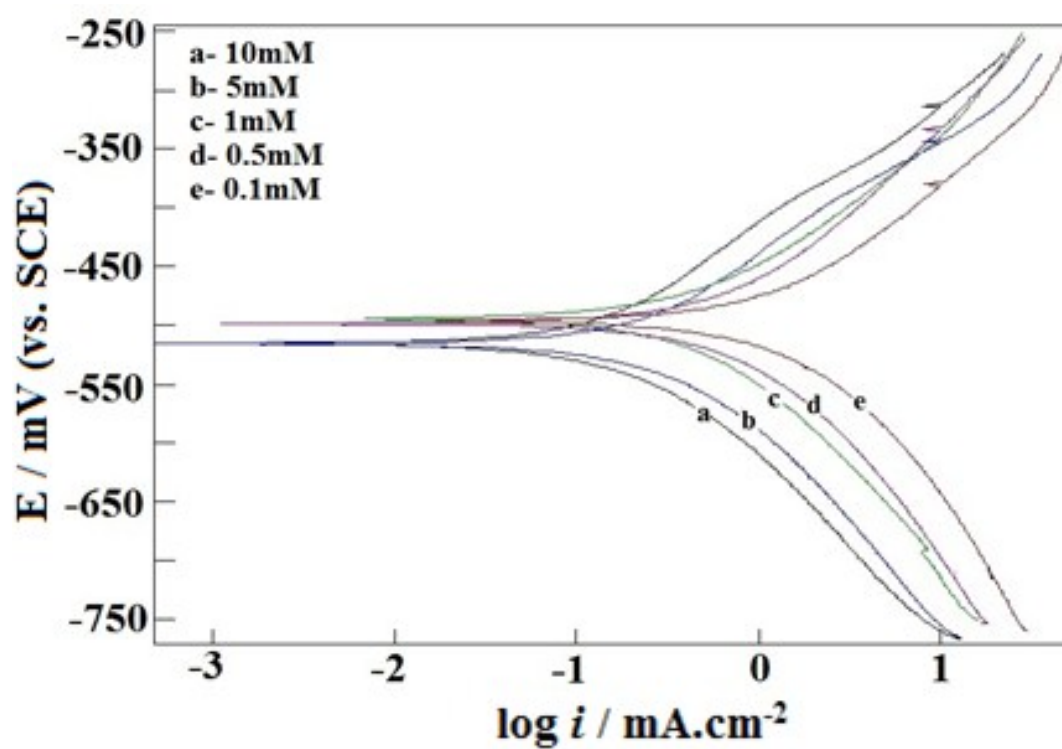

**Fig. S4 (A-C).** Potentiodynamic polarization curves for mild steel in 1M HCl in presence of (A) PMAM, (B) PMTM and (C) PMPM inhibitors.

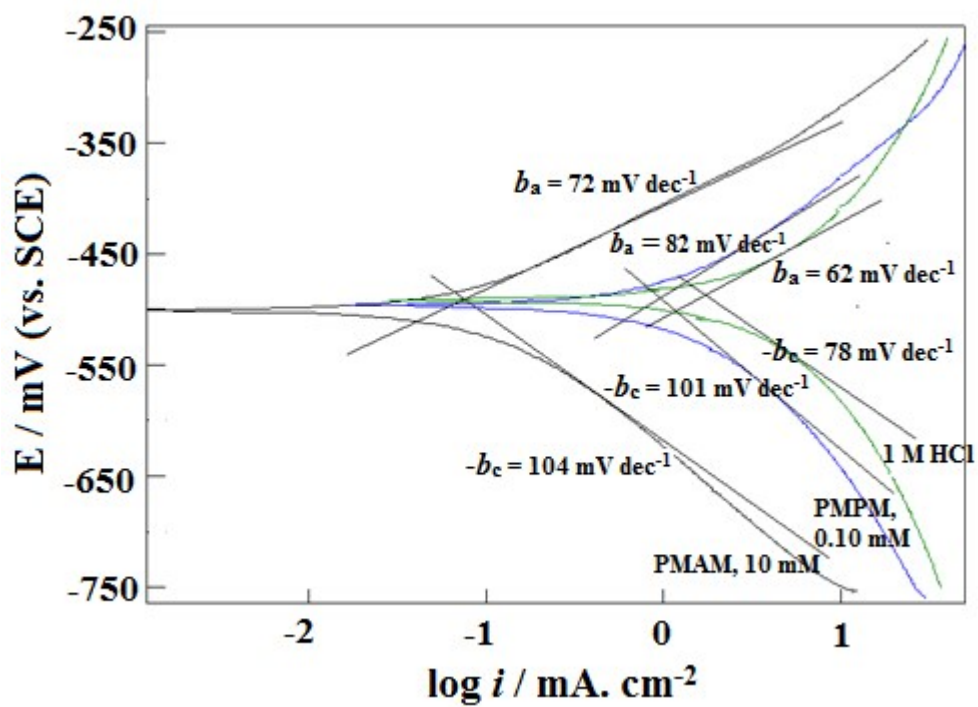

**Fig. S5.** Fitting of the potentiodynamic polarization curves for mild steel in 1M HCl and in the presence of PMPM (0.10 mM) and PMAM (10mM) showing the value of Tafel slopes.

**Fig. S6 A**



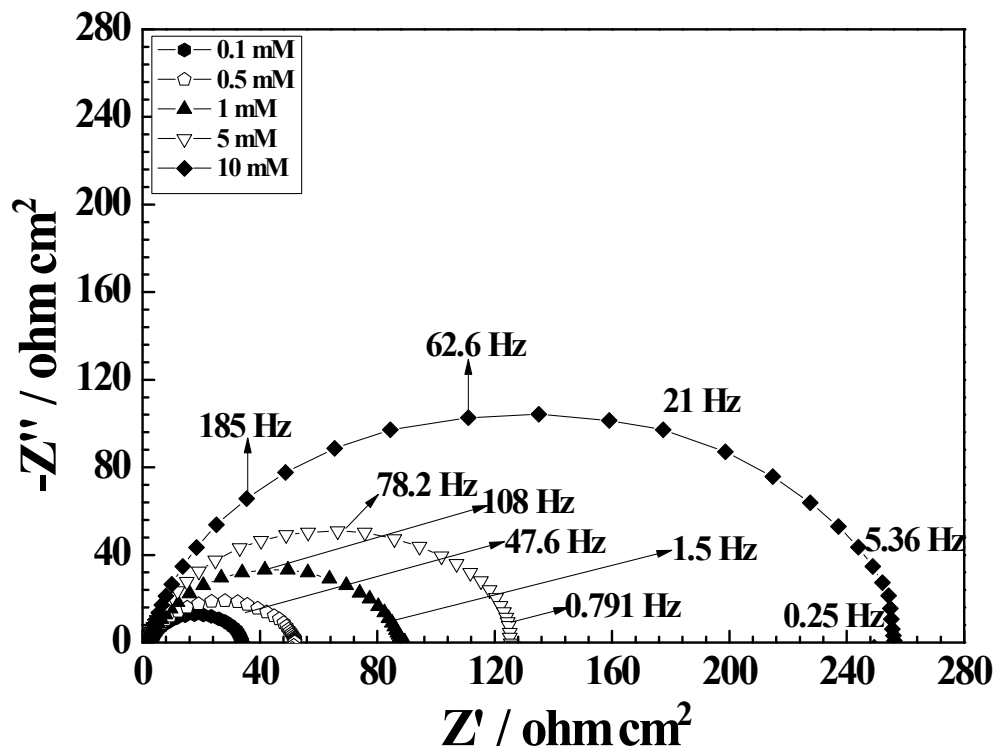

Fig. S6 B

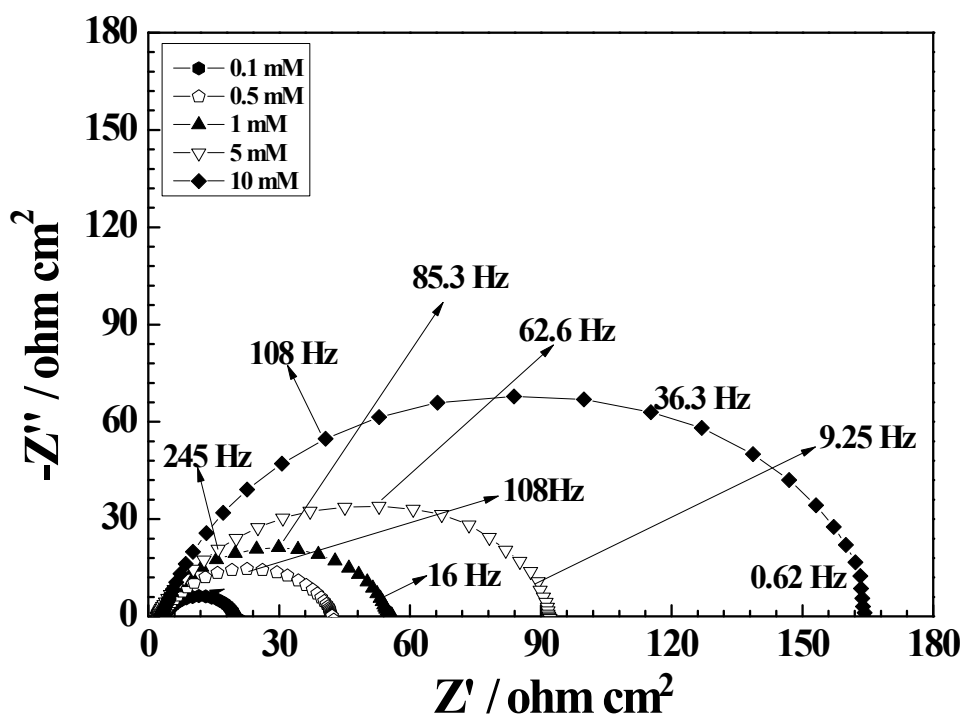

Fig. S6 C

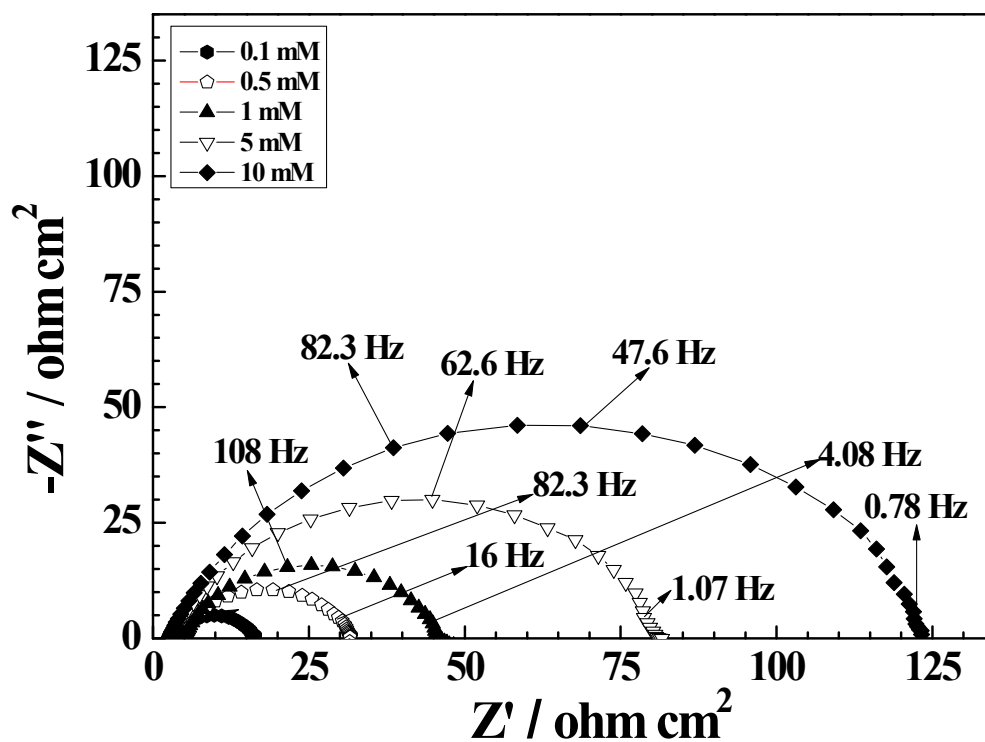

Fig. S6 (A-C). Nyquist plots of mild steel in 1M HCl containing (A) PMAM, (B) PMTM and (C) PMPM inhibitors.

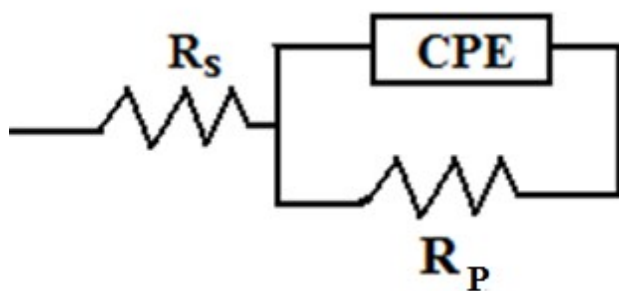

Fig. S7 Equivalent circuit model used to fit the impedance spectra.

Fig. S8 A

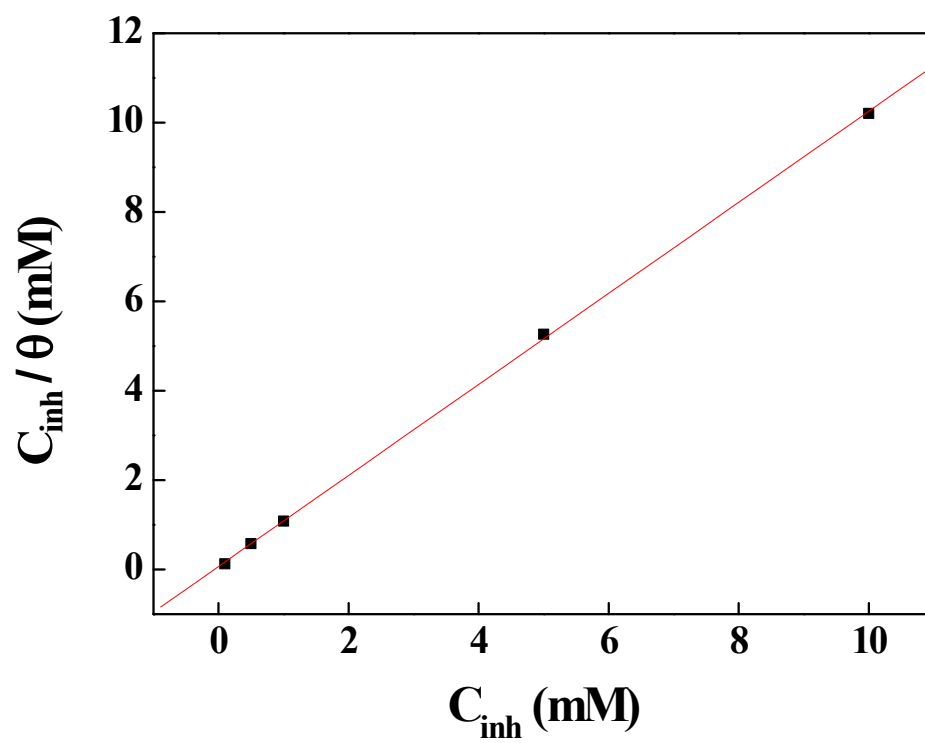

Fig. S8 B

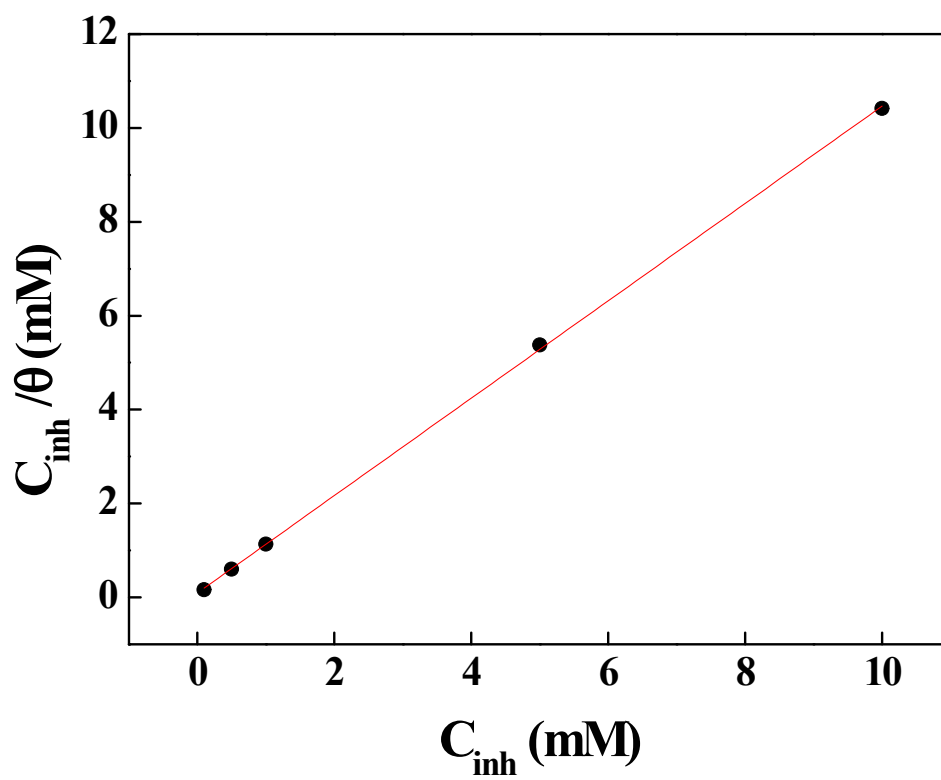

Fig. S8 C

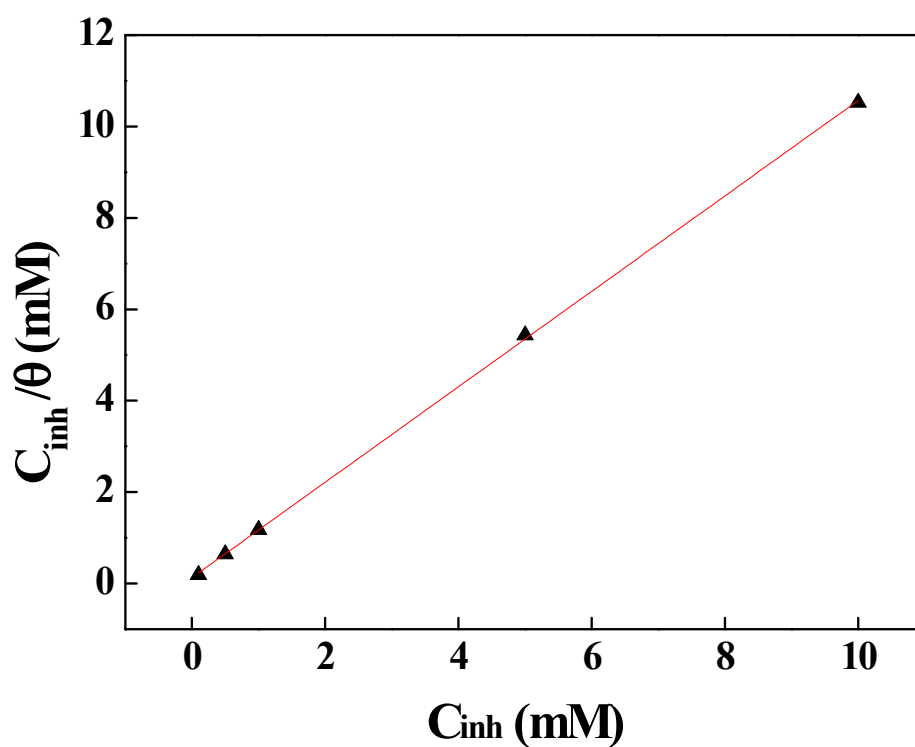

Fig. S8 (A-C). Langmuir adsorption plots for mild steel in 1M HCl at 303K containing different concentration of (A) PMAM, (B) PMTM and (C) PMPM.

**Table S1.** Calculated Fukui functions for the three inhibitor molecules.

| Atom   | PMAM    |         | PMTM    |         | PMPM    |         |
|--------|---------|---------|---------|---------|---------|---------|
|        | $f_k^+$ | $f_k^-$ | $f_k^+$ | $f_k^-$ | $f_k^+$ | $f_k^-$ |
| C (1)  | 0.044   | 0.014   | 0.046   | 0.009   | 0.045   | 0.021   |
| C (2)  | 0.077   | 0.022   | 0.080   | 0.014   | 0.079   | 0.030   |
| C (3)  | 0.058   | 0.013   | 0.059   | 0.008   | 0.058   | 0.017   |
| C (4)  | 0.050   | 0.019   | 0.053   | 0.012   | 0.053   | 0.027   |
| C (5)  | 0.058   | 0.009   | 0.057   | 0.005   | 0.057   | 0.014   |
| N (6)  | 0.073   | 0.017   | 0.075   | 0.011   | 0.075   | 0.027   |
| C (7)  | 0.098   | 0.051   | 0.105   | 0.029   | 0.109   | 0.059   |
| N (8)  | 0.092   | 0.034   | 0.094   | 0.016   | 0.100   | 0.082   |
| C (9)  | 0.009   | 0.031   | 0.008   | 0.046   | 0.008   | 0.019   |
| C (10) | 0.032   | 0.038   | 0.028   | 0.030   | 0.032   | 0.048   |
| C (11) | 0.024   | 0.087   | 0.022   | 0.048   | 0.023   | 0.072   |
| C (12) | 0.039   | 0.048   | 0.037   | 0.038   | 0.040   | 0.086   |
| C (13) | 0.018   | 0.062   | 0.016   | 0.033   | 0.018   | 0.071   |
| C (14) | 0.026   | 0.055   | 0.022   | 0.029   | 0.025   | 0.068   |
| C (15) | 0.024   | 0.059   | 0.020   | 0.039   | 0.022   | 0.045   |
| N (16) | 0.023   | 0.136   | –       | –       | –       | –       |
| S (16) | –       | –       | 0.040   | 0.403   | –       | –       |
| O (16) | –       | –       | –       | –       | 0.014   | 0.061   |
